# Supplementary material for: A Novel Model Based on Genomic Instability-Associated Long Non-Coding RNAs for Predicting Prognosis and Response to Immunotherapy in Patients With Lung Adenocarcinoma
Source: Front Genet. 2021 Oct 29;12:720013. doi: 10.3389/fgene.2021.720013 (PMC8585772; doi:10.3389/fgene.2021.720013)
Supplement: Supplementary file 6 [file DataSheet1.XLSX]

## Sheet: mutCount
Table S1. Total mutation count of each case
id	Count
TCGA-97-8174-01A-11D-2284-08	155
TCGA-55-8620-01A-11D-2393-08	579
TCGA-38-6178-01A-11D-1753-08	40
TCGA-05-4424-01A-22D-1855-08	655
TCGA-69-7764-01A-11D-2167-08	93
TCGA-50-6593-01A-11D-1753-08	314
TCGA-55-8203-01A-11D-2238-08	489
TCGA-17-Z000-01A-01W-0746-08	130
TCGA-NJ-A7XG-01A-12D-A397-08	34
TCGA-78-8660-01A-11D-2393-08	243
TCGA-49-6744-01A-11D-1855-08	146
TCGA-44-7669-01A-21D-2063-08	500
TCGA-64-5779-01A-01D-1625-08	401
TCGA-05-5715-01A-01D-1625-08	137
TCGA-05-4403-01A-01D-1265-08	159
TCGA-93-7347-01A-11D-2184-08	106
TCGA-91-8496-01A-11D-2393-08	27
TCGA-44-6778-01A-11D-1855-08	423
TCGA-50-5044-01A-21D-1855-08	91
TCGA-91-6836-01A-21D-1855-08	573
TCGA-69-A59K-01A-11D-A25L-08	553
TCGA-55-7903-01A-11D-2167-08	153
TCGA-MP-A4SW-01A-21D-A24P-08	55
TCGA-17-Z048-01A-01W-0746-08	32
TCGA-MP-A4T7-01A-11D-A24P-08	133
TCGA-69-7761-01A-11D-2167-08	26
TCGA-73-4662-01A-01D-1265-08	227
TCGA-55-8615-01A-11D-2393-08	146
TCGA-17-Z005-01A-01W-0746-08	141
TCGA-MP-A4TI-01A-21D-A24P-08	160
TCGA-69-7973-01A-11D-2184-08	306
TCGA-78-7159-01A-11D-2036-08	349
TCGA-62-8397-01A-11D-2323-08	34
TCGA-MP-A4TH-01A-31D-A25L-08	118
TCGA-55-6712-01A-11D-1855-08	113
TCGA-50-5946-01A-11D-1753-08	751
TCGA-17-Z021-01A-01W-0746-08	100
TCGA-67-3771-01A-01D-1040-01	1177
TCGA-73-7498-01A-12D-2184-08	135
TCGA-67-4679-01B-01D-1753-08	333
TCGA-44-3396-01A-01D-1553-08	144
TCGA-38-4625-01A-01D-1553-08	651
TCGA-50-5072-01A-21D-1855-08	178
TCGA-97-7547-01A-11D-2036-08	182
TCGA-55-7913-01B-11D-2238-08	367
TCGA-17-Z060-01A-01W-0747-08	326
TCGA-69-8253-01A-11D-2284-08	173
TCGA-86-8278-01A-11D-2284-08	68
TCGA-86-A4P7-01A-11D-A24P-08	40
TCGA-L9-A443-01A-12D-A24D-08	269
TCGA-17-Z030-01A-01W-0746-08	499
TCGA-93-8067-01A-11D-2284-08	568
TCGA-50-5049-01A-01D-1625-08	638
TCGA-44-3398-01A-01D-1105-08	115
TCGA-55-7284-01B-11D-2238-08	43
TCGA-78-7539-01A-11D-2063-08	506
TCGA-MP-A4TF-01A-11D-A25L-08	449
TCGA-83-5908-01A-21D-2284-08	227
TCGA-75-6205-01A-11D-1753-08	23
TCGA-97-A4M0-01A-11D-A24P-08	451
TCGA-50-5936-01A-11D-1625-08	119
TCGA-55-8085-01A-11D-2238-08	318
TCGA-99-8028-01A-11D-2238-08	155
TCGA-38-7271-01A-11D-2036-08	31
TCGA-50-5051-01A-21D-1855-08	121
TCGA-55-1594-01A-01D-1040-01	234
TCGA-17-Z057-01A-01W-0747-08	409
TCGA-95-7948-01A-11D-2184-08	152
TCGA-44-A47G-01A-21D-A24D-08	31
TCGA-55-6985-01A-11D-1945-08	467
TCGA-86-8585-01A-11D-2393-08	629
TCGA-55-8207-01A-11D-2238-08	377
TCGA-78-8655-01A-11D-2393-08	125
TCGA-64-5778-01A-01D-1625-08	553
TCGA-64-1676-01A-01D-0969-08	692
TCGA-50-5935-01A-11D-1753-08	42
TCGA-49-4507-01A-01D-1265-08	216
TCGA-55-7727-01A-11D-2167-08	237
TCGA-49-4514-01A-21D-1855-08	355
TCGA-78-7220-01A-11D-2036-08	1007
TCGA-86-8279-01A-11D-2284-08	599
TCGA-44-6779-01A-11D-1855-08	112
TCGA-L9-A5IP-01A-21D-A397-08	346
TCGA-69-7974-01A-11D-2184-08	525
TCGA-91-6828-01A-11D-1855-08	279
TCGA-86-8281-01A-11D-2284-08	275
TCGA-55-7574-01A-11D-2036-08	126
TCGA-55-7728-01A-11D-2184-08	106
TCGA-44-3919-01A-02D-1458-08	39
TCGA-49-4510-01A-01D-1265-08	51
TCGA-86-7713-01A-11D-2063-08	185
TCGA-17-Z020-01A-01W-0746-08	79
TCGA-S2-AA1A-01A-12D-A397-08	120
TCGA-86-7701-01A-11D-2167-08	205
TCGA-49-AAR3-01A-11D-A410-08	74
TCGA-55-8514-01A-11D-2393-08	326
TCGA-44-5644-01A-21D-2036-08	1140
TCGA-75-6203-01A-11D-1753-08	11
TCGA-38-4627-01A-01D-1553-08	19
TCGA-05-4405-01A-21D-1855-08	353
TCGA-55-8510-01A-11D-2393-08	315
TCGA-55-A492-01A-11D-A24D-08	283
TCGA-44-2665-01A-01D-A271-08	35
TCGA-55-7815-01A-11D-2167-08	140
TCGA-55-6971-01A-11D-1945-08	91
TCGA-55-8507-01A-11D-2393-08	1126
TCGA-55-8511-01A-11D-2393-08	571
TCGA-05-4434-01A-01D-1265-08	35
TCGA-55-6987-01A-11D-1945-08	152
TCGA-86-A456-01A-11D-A24D-08	317
TCGA-O1-A52J-01A-11D-A25L-08	193
TCGA-55-7725-01A-11D-2167-08	158
TCGA-17-Z015-01A-01W-0746-08	601
TCGA-49-6761-01A-31D-1945-08	191
TCGA-50-5944-01A-11D-1753-08	79
TCGA-J2-8192-01A-11D-2238-08	66
TCGA-50-6591-01A-11D-1753-08	50
TCGA-05-4402-01A-01D-1265-08	65
TCGA-97-A4M7-01A-11D-A24P-08	304
TCGA-55-1592-01A-01D-0969-08	596
TCGA-86-8056-01A-11D-2238-08	270
TCGA-50-5055-01A-01D-1625-08	5
TCGA-55-7911-01A-11D-2167-08	230
TCGA-50-8460-01A-11D-2323-08	28
TCGA-44-3918-01A-01D-A271-08	852
TCGA-49-AARN-01A-21D-A410-08	518
TCGA-38-A44F-01A-11D-A24D-08	6
TCGA-44-2655-01A-01D-1553-08	137
TCGA-05-4420-01A-01D-1265-08	333
TCGA-75-7031-01A-11D-1945-08	243
TCGA-55-8206-01A-11D-2238-08	30
TCGA-49-4512-01A-21D-1855-08	35
TCGA-05-4382-01A-01D-1931-08	1469
TCGA-38-4630-01A-01D-1265-08	152
TCGA-55-1596-01A-01D-1040-01	216
TCGA-NJ-A55O-01A-11D-A25L-08	87
TCGA-55-8092-01A-11D-2238-08	611
TCGA-17-Z041-01A-01W-0746-08	115
TCGA-MP-A4TC-01A-11D-A24P-08	286
TCGA-05-4415-01A-22D-1855-08	235
TCGA-44-6145-01A-11D-1753-08	320
TCGA-62-A46S-01A-11D-A24D-08	124
TCGA-17-Z031-01A-01W-0746-08	2796
TCGA-55-8087-01A-11D-2238-08	29
TCGA-55-8205-01A-11D-2238-08	463
TCGA-86-8075-01A-11D-2238-08	37
TCGA-49-4506-01A-01D-1265-08	103
TCGA-97-7554-01A-11D-2036-08	473
TCGA-97-7553-01A-21D-2036-08	30
TCGA-62-8398-01A-11D-2323-08	96
TCGA-50-5941-01A-11D-1753-08	297
TCGA-44-A479-01A-31D-A24D-08	266
TCGA-95-8039-01A-11D-2238-08	104
TCGA-L9-A743-01A-43D-A397-08	67
TCGA-71-6725-01A-11D-1855-08	57
TCGA-86-8076-01A-31D-2238-08	50
TCGA-62-8402-01A-11D-2323-08	66
TCGA-64-1679-01A-21D-2063-08	521
TCGA-67-6216-01A-11D-1753-08	19
TCGA-NJ-A55R-01A-11D-A25L-08	284
TCGA-MP-A4SV-01A-11D-A24P-08	247
TCGA-05-5428-01A-01D-1625-08	429
TCGA-17-Z028-01A-01W-0746-08	492
TCGA-17-Z010-01A-01W-0746-08	310
TCGA-99-8025-01A-11D-2238-08	533
TCGA-86-8358-01A-11D-2323-08	1305
TCGA-62-A46U-01A-11D-A24D-08	41
TCGA-55-6980-01A-11D-1945-08	12
TCGA-17-Z011-01A-01W-0746-08	126
TCGA-44-6147-01A-31D-A27T-08	55
TCGA-97-7938-01A-11D-2167-08	439
TCGA-44-7660-01A-11D-2063-08	375
TCGA-86-7953-01A-11D-2184-08	50
TCGA-44-7672-01A-11D-2063-08	127
TCGA-17-Z056-01A-01W-0747-08	326
TCGA-86-8054-01A-11D-2238-08	259
TCGA-86-8074-01A-11D-2238-08	73
TCGA-78-7155-01A-11D-2036-08	1828
TCGA-95-7562-01A-11D-2238-08	472
TCGA-17-Z023-01A-01W-0746-08	427
TCGA-50-5931-01A-11D-1753-08	349
TCGA-05-4427-01A-21D-1855-08	1088
TCGA-44-3917-01A-01D-A271-08	229
TCGA-86-7955-01A-11D-2184-08	357
TCGA-95-A4VN-01A-11D-A25L-08	378
TCGA-44-8120-01A-11D-2238-08	720
TCGA-69-7980-01A-11D-2184-08	877
TCGA-44-7661-01A-11D-2063-08	232
TCGA-97-A4M5-01A-11D-A24P-08	122
TCGA-80-5611-01A-01D-1625-08	218
TCGA-75-5147-01A-01D-1625-08	38
TCGA-35-3615-01A-01D-1040-01	142
TCGA-55-6984-01A-11D-1945-08	25
TCGA-97-7546-01A-11D-2036-08	311
TCGA-97-8552-01A-11D-2393-08	24
TCGA-17-Z044-01A-01W-0746-08	148
TCGA-95-7944-01A-11D-2184-08	279
TCGA-50-5068-01A-01D-1625-08	86
TCGA-MP-A4T8-01A-11D-A24P-08	138
TCGA-49-4494-01A-01D-1265-08	205
TCGA-80-5607-01A-31D-1945-08	143
TCGA-05-4384-01A-01D-1753-08	133
TCGA-44-A4SU-01A-11D-A24P-08	135
TCGA-55-6969-01A-11D-1945-08	426
TCGA-NJ-A4YQ-01A-11D-A25L-08	1101
TCGA-17-Z027-01A-01W-0746-08	104
TCGA-73-7499-01A-11D-2184-08	59
TCGA-69-7760-01A-11D-2167-08	77
TCGA-44-7667-01A-31D-2063-08	489
TCGA-67-6217-01A-11D-1753-08	174
TCGA-44-2657-01A-01D-1105-08	389
TCGA-97-8176-01A-11D-2393-08	162
TCGA-44-A47A-01A-21D-A24D-08	190
TCGA-55-6972-01A-11D-1945-08	299
TCGA-78-7150-01A-21D-2036-08	468
TCGA-L9-A444-01A-21D-A24D-08	567
TCGA-99-7458-01A-11D-2036-08	490
TCGA-99-AA5R-01A-11D-A397-08	5
TCGA-69-7763-01A-11D-2167-08	74
TCGA-44-6144-01A-11D-1753-08	232
TCGA-44-7670-01A-11D-2063-08	1270
TCGA-05-4250-01A-01D-1105-08	417
TCGA-NJ-A4YI-01A-11D-A25L-08	537
TCGA-91-6835-01A-11D-1855-08	48
TCGA-97-8171-01A-11D-2284-08	60
TCGA-67-6215-01A-11D-1753-08	99
TCGA-L4-A4E5-01A-11D-A24P-08	398
TCGA-55-7994-01A-11D-2184-08	1788
TCGA-17-Z026-01A-01W-0746-08	814
TCGA-49-AARQ-01A-11D-A410-08	790
TCGA-78-7146-01A-11D-2036-08	438
TCGA-55-A57B-01A-12D-A397-08	34
TCGA-49-6743-01A-11D-1855-08	760
TCGA-05-4426-01A-01D-1265-08	52
TCGA-17-Z059-01A-01W-0747-08	180
TCGA-17-Z002-01A-01W-0746-08	4
TCGA-78-8648-01A-11D-2393-08	1
TCGA-86-8672-01A-21D-2393-08	313
TCGA-64-5781-01A-01D-1625-08	1181
TCGA-64-5815-01A-01D-1625-08	186
TCGA-75-5146-01A-01D-1625-08	217
TCGA-50-6597-01A-11D-1855-08	60
TCGA-17-Z058-01A-01W-0747-08	291
TCGA-44-2656-01A-41D-A27T-08	784
TCGA-86-8359-01A-11D-2323-08	180
TCGA-55-7283-01A-11D-2036-08	212
TCGA-78-7162-01A-21D-2063-08	58
TCGA-78-7536-01A-11D-2063-08	736
TCGA-69-8254-01A-11D-2284-08	87
TCGA-44-2668-01A-01D-A271-08	318
TCGA-44-6776-01A-11D-1855-08	232
TCGA-55-7576-01A-11D-2063-08	381
TCGA-91-6847-01A-11D-1945-08	78
TCGA-86-8669-01A-11D-2393-08	142
TCGA-05-4425-01A-01D-1753-08	46
TCGA-95-7043-01A-11D-1945-08	1294
TCGA-67-3773-01A-01D-1040-01	122
TCGA-49-4487-01A-21D-1855-08	260
TCGA-75-5126-01A-01D-1753-08	547
TCGA-53-7813-01A-11D-2167-08	162
TCGA-50-6594-01A-11D-1753-08	632
TCGA-55-A48Y-01A-11D-A24D-08	319
TCGA-MP-A4TK-01A-11D-A24P-08	333
TCGA-78-7149-01A-11D-2036-08	145
TCGA-55-7995-01A-11D-2184-08	773
TCGA-05-4432-01A-01D-1265-08	561
TCGA-55-8097-01A-11D-2238-08	115
TCGA-78-7167-01A-11D-2063-08	211
TCGA-86-8674-01A-21D-2393-08	350
TCGA-49-AAR2-01A-11D-A397-08	468
TCGA-35-5375-01A-01D-1625-08	481
TCGA-05-4410-01A-21D-1855-08	1067
TCGA-MP-A4TJ-01A-51D-A25L-08	66
TCGA-91-6848-01A-11D-1945-08	651
TCGA-17-Z001-01A-01W-0746-08	241
TCGA-17-Z051-01A-01W-0747-08	294
TCGA-17-Z050-01A-01W-0747-08	177
TCGA-53-7626-01A-12D-2063-08	426
TCGA-L9-A8F4-01A-11D-A397-08	821
TCGA-17-Z004-01A-01W-0746-08	23
TCGA-86-6562-01A-11D-1753-08	43
TCGA-49-4486-01A-01D-1265-08	138
TCGA-MN-A4N4-01A-12D-A24P-08	1395
TCGA-91-6831-01A-11D-1855-08	311
TCGA-91-7771-01A-11D-2167-08	154
TCGA-44-2662-01A-01D-A271-08	177
TCGA-91-A4BD-01A-11D-A24D-08	28
TCGA-55-6970-01A-11D-1945-08	196
TCGA-67-3772-01A-01W-0928-08	52
TCGA-55-7907-01A-11D-2167-08	1341
TCGA-71-8520-01A-11D-2393-08	97
TCGA-64-5774-01A-01D-1625-08	163
TCGA-75-7025-01A-12D-1945-08	29
TCGA-MN-A4N1-01A-11D-A24P-08	495
TCGA-97-8175-01A-11D-2284-08	29
TCGA-55-8204-01A-11D-2238-08	223
TCGA-78-7145-01A-11D-2036-08	230
TCGA-62-A46Y-01A-11D-A24D-08	39
TCGA-55-8512-01A-11D-2393-08	44
TCGA-50-5933-01A-11D-1753-08	497
TCGA-69-7765-01A-11D-2167-08	585
TCGA-50-6595-01A-12D-1855-08	53
TCGA-50-8457-01A-11D-2323-08	53
TCGA-78-7154-01A-11D-2036-08	295
TCGA-44-5643-01A-01D-1625-08	153
TCGA-17-Z054-01A-01W-0747-08	8
TCGA-55-6983-01A-11D-1945-08	87
TCGA-62-A46V-01A-11D-A24D-08	55
TCGA-91-6829-01A-21D-1855-08	697
TCGA-17-Z017-01A-01W-0746-08	251
TCGA-05-4397-01A-01D-1265-08	983
TCGA-78-7540-01A-11D-2063-08	37
TCGA-17-Z033-01A-01W-0746-08	122
TCGA-49-AAR0-01A-21D-A397-08	104
TCGA-35-4123-01A-01D-1105-08	329
TCGA-05-4396-01A-21D-1855-08	300
TCGA-97-A4M6-01A-11D-A24P-08	31
TCGA-55-7910-01A-11D-2167-08	338
TCGA-17-Z055-01A-01W-0747-08	453
TCGA-97-7941-01A-11D-2184-08	83
TCGA-MP-A4TA-01A-21D-A24P-08	347
TCGA-78-7633-01A-11D-2063-08	135
TCGA-78-7147-01A-11D-2036-08	389
TCGA-50-5045-01A-01D-1625-08	240
TCGA-97-A4M2-01A-12D-A24P-08	5
TCGA-53-7624-01A-11D-2063-08	973
TCGA-35-4122-01A-01D-1105-08	265
TCGA-62-8394-01A-11D-2323-08	89
TCGA-55-6543-01A-11D-1753-08	22
TCGA-55-A491-01A-11D-A24D-08	399
TCGA-17-Z062-01A-01W-0747-08	340
TCGA-91-6830-01A-11D-1945-08	172
TCGA-49-4505-01A-01D-1931-08	221
TCGA-78-7158-01A-11D-2036-08	273
TCGA-49-6742-01A-11D-1855-08	285
TCGA-55-7724-01A-11D-2167-08	125
TCGA-38-4629-01A-02D-1265-08	327
TCGA-55-A490-01A-11D-A24D-08	1446
TCGA-86-7714-01A-12D-2167-08	5
TCGA-44-A47B-01A-11D-A24D-08	57
TCGA-44-7662-01A-11D-2063-08	586
TCGA-44-4112-01A-31D-A27T-08	491
TCGA-05-4422-01A-01D-1265-08	46
TCGA-J2-A4AD-01A-11D-A24D-08	303
TCGA-44-2659-01A-01D-0969-08	469
TCGA-50-6592-01A-11D-1753-08	274
TCGA-75-7027-01A-11D-1945-08	295
TCGA-49-4488-01A-01D-1753-08	337
TCGA-17-Z009-01A-01W-0746-08	7
TCGA-44-6775-01A-31D-A27T-08	52
TCGA-64-5775-01A-01D-1625-08	588
TCGA-55-8301-01A-11D-2284-08	250
TCGA-MP-A4T9-01A-11D-A24P-08	15
TCGA-55-6979-01A-11D-1945-08	101
TCGA-MP-A4T4-01A-11D-A25L-08	327
TCGA-55-8508-01A-11D-2393-08	197
TCGA-NJ-A4YG-01A-22D-A25L-08	122
TCGA-L9-A7SV-01A-11D-A397-08	1840
TCGA-05-4395-01A-01D-1265-08	326
TCGA-97-8179-01A-11D-2284-08	205
TCGA-49-4501-01A-01D-1265-08	45
TCGA-86-8280-01A-11D-2284-08	38
TCGA-93-A4JO-01A-21D-A24P-08	25
TCGA-75-5125-01A-01D-1753-08	161
TCGA-55-8094-01A-11D-2238-08	546
TCGA-38-4632-01A-01D-1753-08	521
TCGA-78-7160-01A-11D-2036-08	39
TCGA-73-4666-01A-01D-1265-08	453
TCGA-73-A9RS-01A-11D-A410-08	1099
TCGA-93-A4JN-01A-11D-A24P-08	69
TCGA-44-6148-01A-11D-1753-08	5
TCGA-49-AAR9-01A-21D-A410-08	787
TCGA-55-8505-01A-11D-2393-08	38
TCGA-17-Z045-01A-01W-0746-08	756
TCGA-67-3774-01A-01D-1040-01	132
TCGA-91-6840-01A-11D-1945-08	131
TCGA-05-5425-01A-02D-1625-08	548
TCGA-55-6982-01A-11D-1945-08	177
TCGA-17-Z019-01A-01W-0746-08	4
TCGA-62-A46R-01A-11D-A24D-08	173
TCGA-86-8668-01A-11D-2393-08	32
TCGA-17-Z047-01A-01W-0747-08	16
TCGA-64-1677-01A-01W-0928-08	201
TCGA-55-5899-01A-11D-1625-08	515
TCGA-49-AARE-01A-11D-A410-08	1629
TCGA-05-4390-01A-02D-1753-08	634
TCGA-50-5939-01A-11D-1625-08	80
TCGA-55-A48Z-01A-12D-A24P-08	50
TCGA-38-4631-01A-01D-1753-08	833
TCGA-99-8032-01A-11D-2238-08	412
TCGA-75-6211-01A-11D-1753-08	400
TCGA-95-8494-01A-11D-2323-08	114
TCGA-55-6642-01A-11D-1855-08	145
TCGA-17-Z014-01A-01W-0746-08	433
TCGA-97-A4M3-01A-11D-A24P-08	225
TCGA-NJ-A4YP-01A-11D-A25L-08	564
TCGA-78-7152-01A-11D-2036-08	188
TCGA-44-8119-01A-11D-2238-08	703
TCGA-05-4418-01A-01D-1265-08	313
TCGA-69-7979-01A-11D-2184-08	1643
TCGA-50-5942-01A-21D-1753-08	35
TCGA-80-5608-01A-31D-1945-08	197
TCGA-73-4676-01A-01D-1753-08	107
TCGA-38-4628-01A-01D-1265-08	122
TCGA-93-A4JQ-01A-11D-A24P-08	49
TCGA-78-7163-01A-12D-2063-08	22
TCGA-55-A4DG-01A-11D-A24D-08	732
TCGA-91-A4BC-01A-11D-A24D-08	405
TCGA-49-4490-01A-21D-1855-08	27
TCGA-17-Z007-01A-01W-0746-08	72
TCGA-44-6146-01A-31D-A27T-08	31
TCGA-44-2661-01A-01D-1105-08	38
TCGA-97-8172-01A-11D-2284-08	277
TCGA-73-4675-01A-01D-1265-08	73
TCGA-55-1595-01A-01D-0969-08	360
TCGA-86-8073-01A-11D-2238-08	1511
TCGA-05-5423-01A-01D-1625-08	171
TCGA-55-8302-01A-11D-2323-08	641
TCGA-NJ-A4YF-01A-12D-A25L-08	706
TCGA-05-4398-01A-01D-1265-08	689
TCGA-62-8395-01A-11D-2323-08	59
TCGA-91-6849-01A-11D-1945-08	144
TCGA-97-A4M1-01A-11D-A24P-08	35
TCGA-44-7659-01A-11D-2063-08	168
TCGA-MP-A4SY-01A-21D-A24P-08	118
TCGA-17-Z032-01A-01W-0746-08	113
TCGA-97-8177-01A-11D-2284-08	23
TCGA-73-4659-01A-01D-1265-08	248
TCGA-75-6206-01A-11D-1753-08	96
TCGA-55-8208-01A-11D-2238-08	123
TCGA-50-8459-01A-11D-2323-08	92
TCGA-97-A4LX-01A-11D-A24P-08	106
TCGA-78-8640-01A-11D-2393-08	766
TCGA-49-AARO-01A-12D-A410-08	599
TCGA-44-8117-01A-11D-2238-08	894
TCGA-50-5066-01A-01D-1625-08	241
TCGA-49-6767-01A-11D-1855-08	514
TCGA-75-6214-01A-41D-1945-08	747
TCGA-MN-A4N5-01A-11D-A24P-08	508
TCGA-55-8091-01A-11D-2238-08	21
TCGA-17-Z061-01A-01W-0747-08	217
TCGA-44-2666-01A-41D-A27T-08	25
TCGA-95-7947-01A-11D-2184-08	631
TCGA-55-8616-01A-11D-2393-08	539
TCGA-93-7348-01A-21D-2036-08	79
TCGA-NJ-A55A-01A-11D-A25L-08	40
TCGA-78-7542-01A-21D-2063-08	424
TCGA-78-8662-01A-11D-2393-08	1380
TCGA-17-Z049-01A-01W-0746-08	724
TCGA-75-5122-01A-01D-1753-08	90
TCGA-44-A4SS-01A-11D-A24P-08	383
TCGA-95-A4VP-01A-21D-A25L-08	127
TCGA-86-8671-01A-11D-2393-08	3
TCGA-49-AAQV-01A-11D-A397-08	34
TCGA-95-7567-01A-11D-2063-08	924
TCGA-75-6207-01A-11D-1753-08	59
TCGA-17-Z037-01A-01W-0746-08	142
TCGA-4B-A93V-01A-11D-A397-08	166
TCGA-53-A4EZ-01A-12D-A24P-08	637
TCGA-67-3770-01A-01D-0969-08	256
TCGA-69-8255-01A-11D-2284-08	329
TCGA-05-5429-01A-01D-1625-08	36
TCGA-97-8547-01A-11D-2393-08	61
TCGA-73-4670-01A-01D-1265-08	443
TCGA-J2-8194-01A-11D-2238-08	171
TCGA-95-A4VK-01A-11D-A25L-08	296
TCGA-78-7535-01A-11D-2063-08	201
TCGA-86-7954-01A-11D-2184-08	170
TCGA-50-6673-01A-11D-1945-08	57
TCGA-55-7281-01A-11D-2036-08	503
TCGA-44-A47F-01A-11D-A24D-08	80
TCGA-44-6777-01A-11D-1855-08	331
TCGA-J2-A4AE-01A-21D-A24D-08	40
TCGA-55-A494-01A-11D-A24P-08	284
TCGA-64-1681-01A-11D-2063-08	52
TCGA-17-Z053-01A-01W-0747-08	383
TCGA-44-5645-01A-51D-A27T-08	42
TCGA-44-7671-01A-11D-2063-08	280
TCGA-MP-A4T6-01A-32D-A25L-08	74
TCGA-49-6745-01A-11D-1855-08	114
TCGA-97-7552-01A-11D-2036-08	21
TCGA-17-Z043-01A-01W-0746-08	237
TCGA-55-7726-01A-11D-2167-08	115
TCGA-17-Z022-01A-01W-0746-08	1450
TCGA-78-7161-01A-11D-2036-08	208
TCGA-91-8497-01A-11D-2393-08	46
TCGA-17-Z025-01A-01W-0746-08	258
TCGA-78-7153-01A-11D-2036-08	83
TCGA-69-7978-01A-11D-2184-08	477
TCGA-17-Z016-01A-01W-0746-08	373
TCGA-49-AAR4-01A-12D-A410-08	342
TCGA-17-Z003-01A-01W-0746-08	238
TCGA-99-8033-01A-11D-2238-08	181
TCGA-50-6590-01A-12D-1855-08	853
TCGA-17-Z018-01A-01W-0746-08	284
TCGA-86-6851-01A-11D-1945-08	959
TCGA-55-6986-01A-11D-1945-08	23
TCGA-62-A470-01A-11D-A24D-08	133
TCGA-MP-A4TE-01A-22D-A25L-08	163
TCGA-55-8089-01A-11D-2238-08	1231
TCGA-86-8673-01A-11D-2393-08	512
TCGA-MP-A4T2-01A-11D-A24P-08	65
TCGA-55-6968-01A-11D-1945-08	513
TCGA-78-7537-01A-11D-2063-08	164
TCGA-05-4417-01A-22D-1855-08	333
TCGA-55-8619-01A-11D-2393-08	5
TCGA-62-8399-01A-21D-2323-08	576
TCGA-05-4244-01A-01D-1105-08	253
TCGA-97-7937-01A-11D-2167-08	509
TCGA-50-7109-01A-11D-2036-08	266
TCGA-55-7914-01A-11D-2167-08	192
TCGA-05-4430-01A-02D-1265-08	224
TCGA-75-6212-01A-11D-1753-08	20
TCGA-50-5930-01A-11D-1753-08	1217
TCGA-86-7711-01A-11D-2063-08	234
TCGA-55-7227-01A-11D-2036-08	192
TCGA-44-6774-01A-21D-1855-08	326
TCGA-93-A4JP-01A-11D-A24P-08	21
TCGA-55-7573-01A-11D-2036-08	54
TCGA-05-4389-01A-01D-1265-08	226
TCGA-86-8055-01A-11D-2238-08	31
TCGA-73-4668-01A-01D-1265-08	673
TCGA-64-1680-01A-02D-0969-08	45
TCGA-62-A471-01A-12D-A24D-08	123
TCGA-55-8299-01A-11D-2284-08	16
TCGA-17-Z013-01A-01W-0746-08	68
TCGA-55-6975-01A-11D-1945-08	89
TCGA-73-4658-01A-01D-1753-08	192
TCGA-MP-A5C7-01A-11D-A25L-08	88
TCGA-50-5932-01A-11D-1753-08	89
TCGA-78-7148-01A-11D-2036-08	232
TCGA-55-8621-01A-11D-2393-08	7
TCGA-62-A46P-01A-11D-A24D-08	308
TCGA-55-A493-01A-11D-A24D-08	199
TCGA-62-A472-01A-11D-A24D-08	63
TCGA-L9-A50W-01A-12D-A397-08	31
TCGA-05-4433-01A-22D-1855-08	43
TCGA-91-8499-01A-11D-2393-08	391
TCGA-55-6978-01A-11D-1945-08	20
TCGA-55-8614-01A-11D-2393-08	245
TCGA-55-8506-01A-11D-2393-08	1970
TCGA-62-A46O-01A-11D-A24D-08	1037
TCGA-78-7166-01A-12D-2063-08	261
TCGA-17-Z042-01A-01W-0746-08	526
TCGA-86-A4JF-01A-11D-A24P-08	1327
TCGA-05-4249-01A-01D-1105-08	372
TCGA-55-8096-01A-11D-2238-08	119
TCGA-MP-A4TD-01A-32D-A25L-08	74
TCGA-38-4626-01A-01D-1553-08	86
TCGA-95-7039-01A-11D-1945-08	1365
TCGA-17-Z052-01A-01W-0747-08	54
TCGA-55-6981-01A-11D-1945-08	51
TCGA-78-7156-01A-11D-2036-08	309
TCGA-55-7570-01A-11D-2036-08	442
TCGA-55-8090-01A-11D-2238-08	107
TCGA-17-Z036-01A-01W-0746-08	87
TCGA-55-A4DF-01A-11D-A24D-08	809
TCGA-05-5420-01A-01D-1625-08	72
TCGA-73-4677-01A-01D-1265-08	293
TCGA-55-A48X-01A-11D-A24D-08	323
TCGA-J2-A4AG-01A-11D-A24D-08	68
